# Supplementary material
Source: PubMed Central journal article supplement (PMC6859438)

**Figure S1**

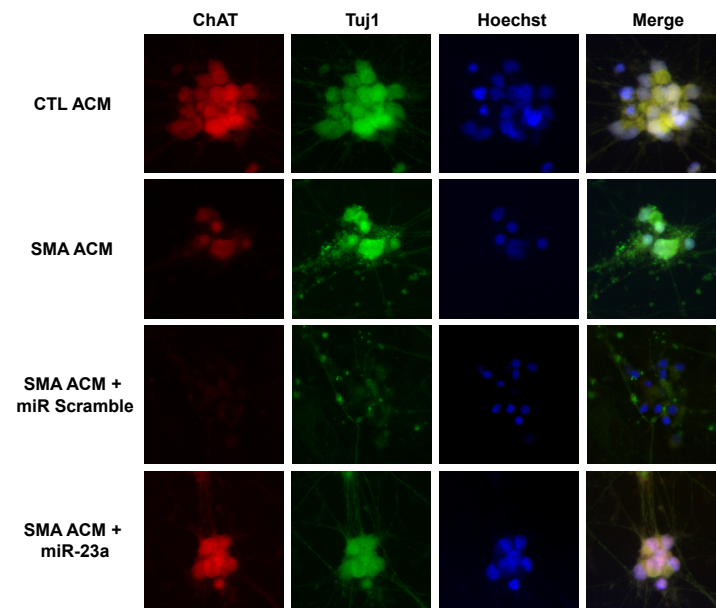

Supplement: figure_s1_ddz142.pdf [file figure_s1_ddz142.pdf]

Figure S2

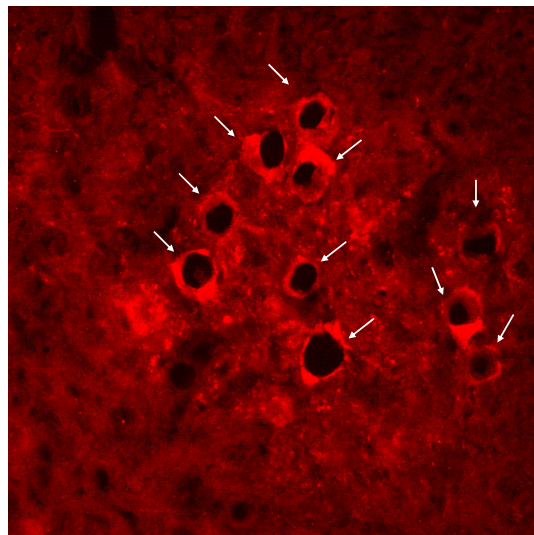

Supplement: figure_s2_ddz142.pdf [file figure_s2_ddz142.pdf]

**Figure S3**

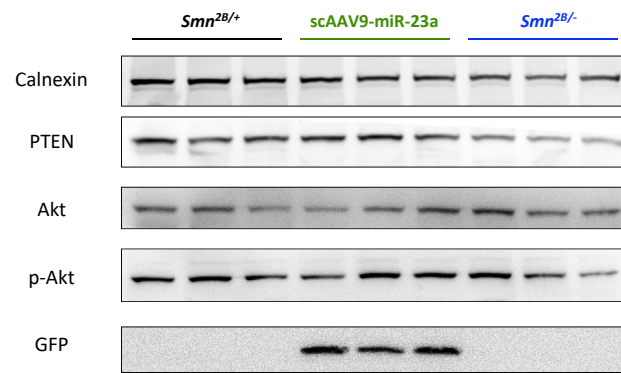

Supplement: figure_s3_ddz142.pdf [file figure_s3_ddz142.pdf]

Figure S5

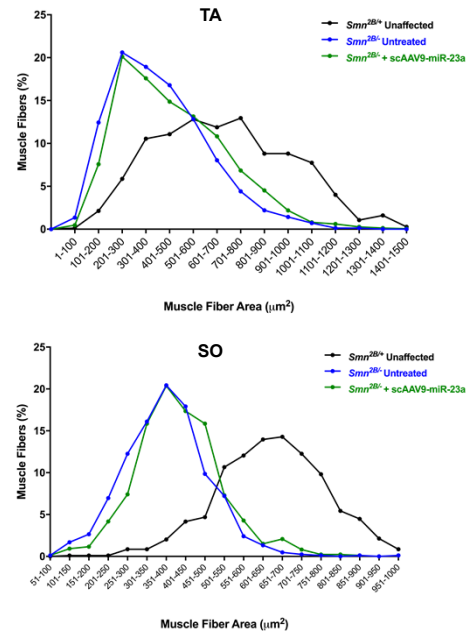

Supplement: figure_s5_ddz142.pdf [file figure_s5_ddz142.pdf]

Figure S6

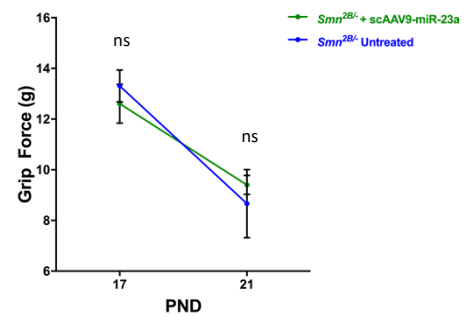

Supplement: figure_s6_ddz142.pdf [file figure_s6_ddz142.pdf]
